# Supplementary material for: Advanced molecular surveillance approaches for characterization of blood borne hepatitis viruses
Source: PubMed Central journal article supplement (PMC7367454; doi:10.1371/journal.pone.0236046), 2020-07-17
Supplement: pone.0236046.s001.pdf [file pone.0236046.s001.pdf]

# S1 Appendix

## Materials & Methods

### Pan-viral enrichment

SSRTIII-Nextera mNGS libraries from the HBV diversity panel were pooled and dried down in a vacuum centrifuge at low heat. Libraries were resuspended in 7  $\mu$ l nuclease-free water, followed by the addition of 5  $\mu$ l Blocker solution (Cot-1 DNA) and 1  $\mu$ l of Universal Blockers and heating at 60°C for 10 minutes. During the incubation, a 28  $\mu$ l probe hybridization mix was assembled, consisting of 20  $\mu$ l Hybridization buffer heated at 65°C for 10 minutes and cooled to 25°C for 5 minutes, followed by the addition of 4  $\mu$ l Pan-Viral Probes and 4  $\mu$ l water. The 28  $\mu$ l probe mix was warmed to 32°C for 2 min and denatured at 95°C for 2 min and snapped chilled for 5 min. The library pool was also warmed to 32°C for 3 min, denatured at 95°C for 5 min, and cooled to 25°C before combining with the Hybridization mix. Hybridization Enhancer (30  $\mu$ l) was overlaid on top of the 40  $\mu$ l reaction and brought to 70°C for  $\geq$ 16 hour hybridization. The entire reaction (70  $\mu$ l) was then rapidly transferred to 100  $\mu$ l of streptavidin beads pre-equilibrated in Binding Buffer. Beads were kept in solution by gentle rotation for 30 minutes, then placed on a magnetic stand for 1 minute to remove unbound DNA. A total of three washes were performed (1 at 25°C and 2 at 48°C) followed by resuspension of beads in 21  $\mu$ l of water and transfer to ice. The DNA-bound beads were then added to 25  $\mu$ l of 2X KAPA HiFi HotStart ReadyMix and 5  $\mu$ l of 10  $\mu$ M Illumina Primer Mix. Captured viral sequences were amplified on a Perkin-Elmer 9700 Thermal Cycler under the following conditions: 1 cycle (98°C\_0:45); 15 cycles (98°C\_0:15, 60°C\_0:30, 72°C\_0:30); 1 cycle (72°C\_1:00); hold at 4°C. PCR products were cleaned up with DNA purification beads and washed with 80% ethanol, followed by elution in 22  $\mu$ l of water. PCR amplification was repeated as above using 20  $\mu$ l of eluate (no SA beads) as template and purified once again.
