# Supplementary material for: Advanced molecular surveillance approaches for characterization of blood borne hepatitis viruses
Source: PubMed Central journal article supplement (PMC7367454; doi:10.1371/journal.pone.0236046), 2020-07-17

## Positive control log 4 cp/ml: Genome coverage

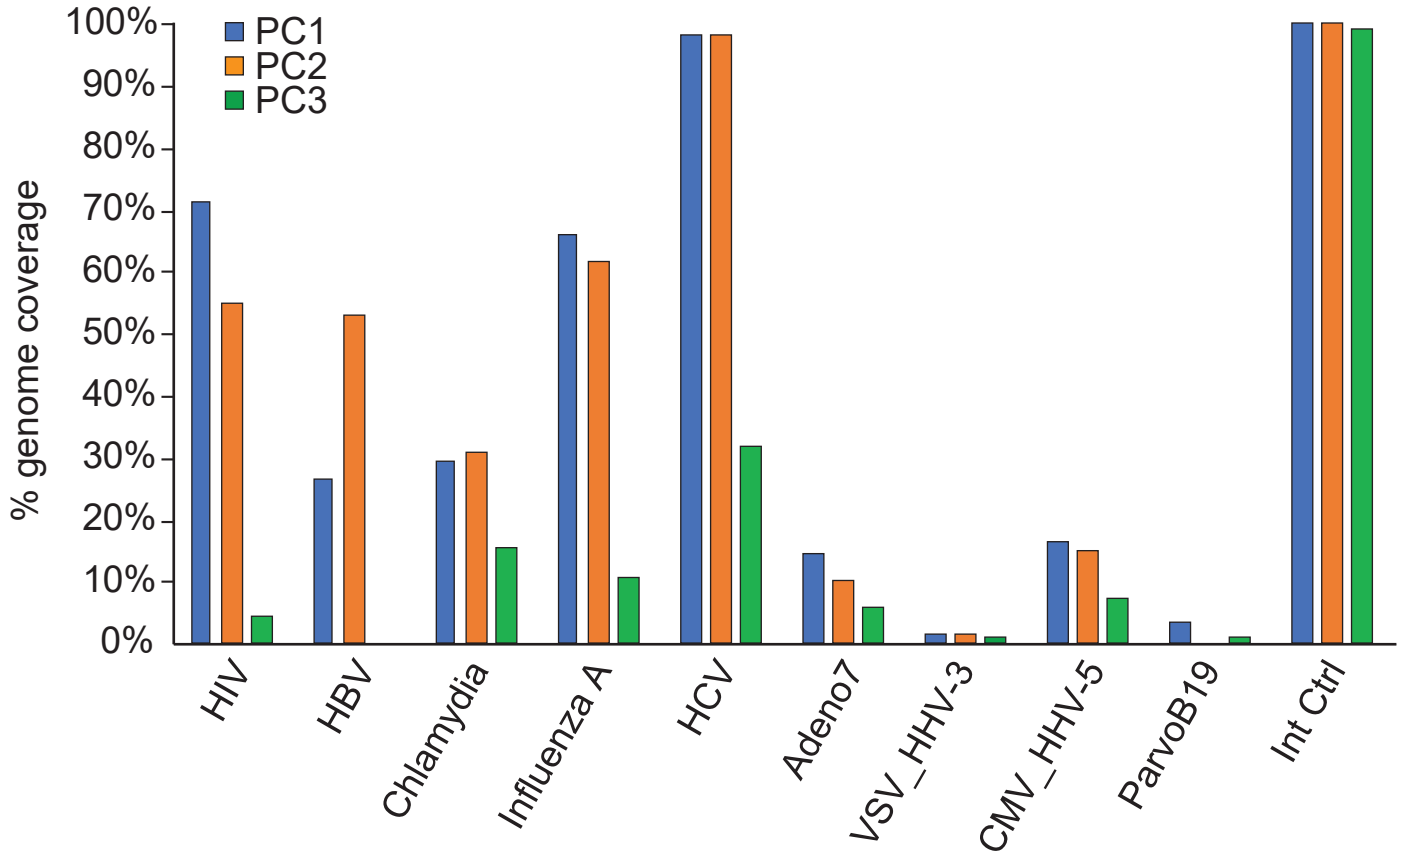

## Positive control log 4 cp/ml: Reads/million

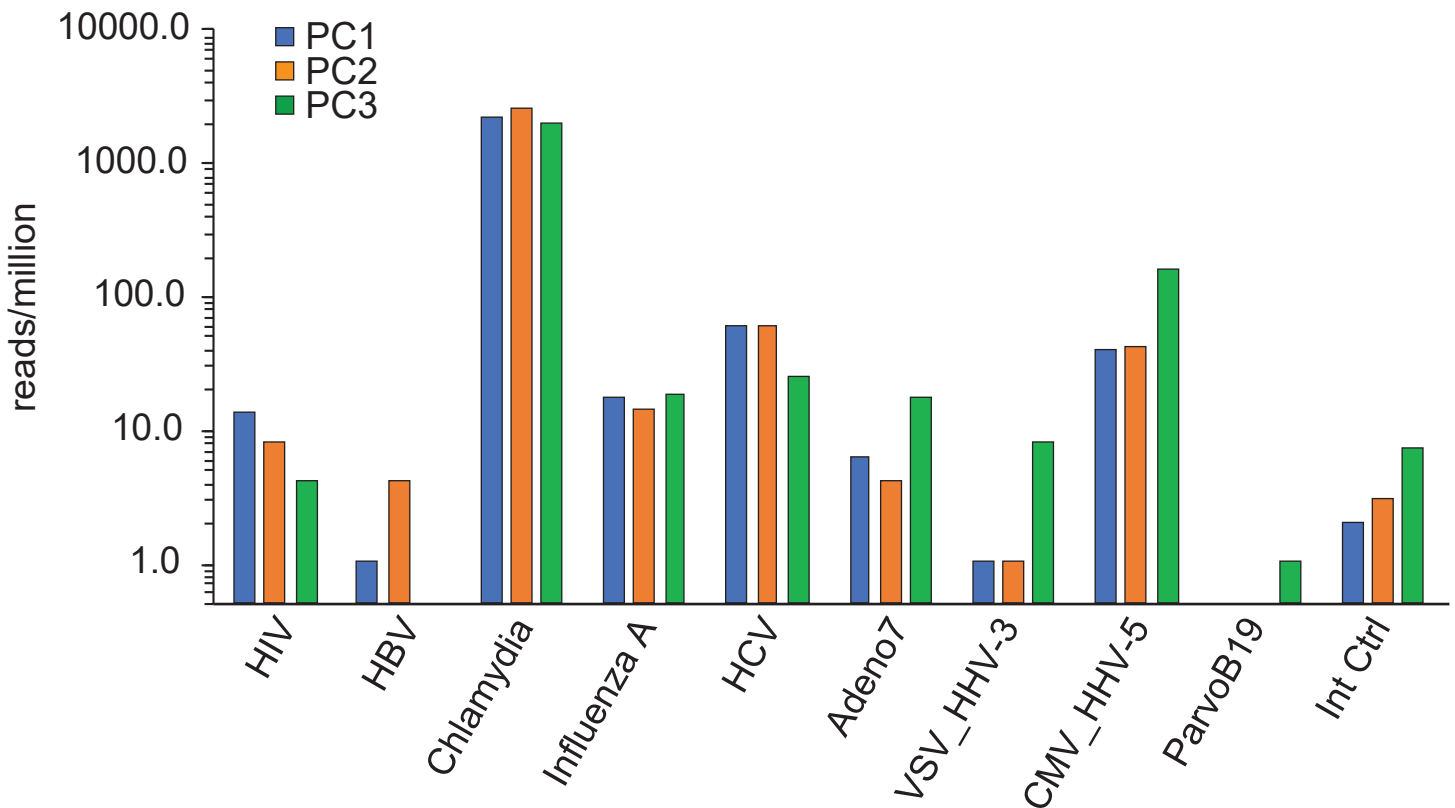

Supplement: pone.0236046.s002.pdf [file pone.0236046.s002.pdf]
