# Supplementary material for: Advanced molecular surveillance approaches for characterization of blood borne hepatitis viruses
Source: PubMed Central journal article supplement (PMC7367454; doi:10.1371/journal.pone.0236046), 2020-07-17
Supplement: pone.0236046.s003.pdf [file pone.0236046.s003.pdf]

| Sample ID | Patient ID | Virus | Age | Sex | Country of Birth | VL HCV              | Risk group        |
|-----------|------------|-------|-----|-----|------------------|---------------------|-------------------|
| 2000427   | 242844     | HCV   | 82  | F   | Morocco          | 1291888             | organ transplant  |
| 2000444   | 242924     | HCV   | 56  | M   | FSU              | n.d.                | organ transplant  |
| 2000445   | 240370     | HCV   | 38  | F   | Ukraine          | 23644               | HETERO            |
| 2000446   | 242925     | HCV   | 52  | M   | Latvia           | 1200000             | Unknown           |
| 2000447   | 242942     | HCV   | 62  |     | Romenia          | n.d.                | blood transfusion |
| 2000449   | 242948     | HCV   | 80  | M   | Israel           | 1231418             | Blood-hemophilia  |
| 2000463   | 243036     | HCV   | 75  | M   | FSU              | 270520              | Unknown           |
| 2000478   | 243091     | HCV   | 56  | M   | FSU              | n.d.                | blood transfusion |
| 2000484   | 243137     | HCV   | 56  | F   | FSU              | 988359              | Unknown           |
| 2000485   | 243141     | HCV   | 81  | F   | Israel           | n.d.                | blood transfusion |
| 2000487   | 243170     | HCV   | 73  | F   | Israel           | 202000              | Unknown           |
| 2000502   | 243242     | HCV   | 70  | M   | Iraq             | n.d.                | Unknown           |
| 2000512   | 243322     | HCV   | 63  | M   | Israel           | 878516              | Unknown           |
| 2000513   | 243341     | HCV   | 41  | F   | FSU              | 2258252             | blood transfusion |
| 2000516   | 243353     | HCV   | 54  | M   | Morocco          | n.d.                | blood transfusion |
| 2000517   | 243364     | HCV   | 46  | F   | FSU              | 661302              | Unknown           |
| 2000545   | 243717     | HCV   | 70  | F   | FSU              | 291730              | Unknown           |
| 2000554   | 243848     | HCV   | 63  | F   | Romenia          | 1225671             | blood transfusion |
| 2000561   | 243910     | HCV   | 63  | F   | Romenia          | 506624              | organ transplant  |
| 2000572   | 244001     | HCV   | 69  | M   | Israel           | n.d.                | IDU               |
| 2000573   | 244003     | HCV   | 80  | F   | FSU              | 562026              | Unknown           |
| 2000599   | 244235     | HCV   | 69  | F   | Egypt            | n.d.                | blood transfusion |
| 2000602   | 244240     | HCV   | 78  | F   | Poland           | n.d.                | Unknown           |
| 2000607   | 244268     | HCV   | 51  | M   | Israel           | n.d.                | Unknown           |
| 2000613   | 244310     | HCV   | 58  | M   | FSU              | 121082              | Unknown           |
| 2000615   | 244344     | HCV   | 64  | F   | Moldova          | 1866050             | Unknown           |
| 2000616   | 244342     | HCV   | 36  | M   | Israel           | n.d.                | Unknown           |
| 2000618   | 244347     | HCV   | 65  | F   | Georgia          | n.d.                | Unknown           |
| 2000619   | 244348     | HCV   | 29  | M   | FSU              | 548348              | Unknown           |
| 2000621   | 244351     | HCV   | 50  | F   | Ukraine          | 1706864             | Unknown           |
| 2000633   | 244431     | HCV   | 54  | F   | FSU              | 142990              | Unknown           |
| 2000637   | 244462     | HCV   | 86  | F   | FSU              | 1529353             | Unknown           |
| 2000646   | 244543     | HCV   | 70  | M   | Iraq             | 607035              | blood transfusion |
| 2000650   | 244588     | HCV   | 62  | M   | FSU              | 2559464             | Unknown           |
| 2000668   | 244720     | HCV   | 74  | F   | FSU              | 6016394             | blood transfusion |
| 2000669   | 244728     | HCV   | 74  | M   | Romenia          | 884442              | IDU               |
| 2000670   | 244740     | HCV   | 54  | M   | Uzbekistan       | 498229              | Unknown           |
| 2000672   | 244752     | HCV   | 67  | F   | Morocco          | 60070015            | Unknown           |
| 2000675   | 244769     | HCV   | 70  | M   | Bulgaria         | 15769               | blood transfusion |
| 2000676   | 244788     | HCV   | 64  | F   | Romenia          | 238486              | blood transfusion |
| 2000684   | 244934     | HCV   | 53  | M   | FSU              | 3809424             | Unknown           |
| 2000691   | 245007     | HCV   | 19  | M   | Georgia          | 2460000             | Unknown           |
| 2000692   | 245000     | HCV   | 49  | M   | Ukraine          | 637000              | Health worker     |
| 2000693   | 244998     | HCV   | 61  | F   | FSU              | 1410000             | blood transfusion |
| 2000694   | 244996     | HCV   | 50  | F   | FSU              | 1490000             | Unknown           |
| 2000697   | 245017     | HCV   | 45  | M   | unknown          | n.d.                | Unknown           |
| 2000705   | 245158     | HCV   | 79  | F   | Russia           | 9339704             | Unknown           |
| 2000726   | 245342     | HCV   | 78  | F   | Ukraine          | 257436              | blood transfusion |
| 2000734   | 243037     | HCV   | 71  | F   | FSU              | 4330156             | Unknown           |
| 2000775   | 245614     | HCV   | 76  | M   | FSU              | 4751713             | blood transfusion |
| 2000781   | 245661     | HCV   | 39  | F   | Israel           | 12730               | Unknown           |
| 2000782   | 245662     | HCV   | 80  | M   | Ukraine          | n.d.                | Unknown           |
| 2000785   | 245669     | HCV   | 63  | F   | Moldova          | 83277               | Unknown           |
| 2000790   | 245698     | HCV   | 75  | M   | Moldova          | 768300              | blood transfusion |
| 2000791   | 245708     | HCV   | 54  | F   | FSU              | n.d.                | Unknown           |
| 2000798   | 245767     | HCV   | 58  | F   | FSU              | n.d.                | Unknown           |
| 2000810   | 245853     | HCV   | 52  | M   | Israel           | n.d.                | IDU               |
| 2000811   | 245851     | HCV   | 70  | M   | Israel           | 11360455            | Unknown           |
| 2000883   | 246370     | HCV   | 31  | M   | France           | n.d.                | Unknown           |
| 2000887   | 246449     | HCV   | 47  | F   | Romenia          | n.d.                | blood transfusion |
| 2000889   | 246497     | HCV   | 74  | M   | FSU              | 615416              | Unknown           |
| 2000912   | 246885     | HCV   | 53  | M   | Israel           | 19556               | IDU               |
| 2000913   | 246911     | HCV   | 70  |     | Poland           | 459910              | Unknown           |
| 2000929   | 247112     | HCV   | 57  | M   | Morocco          | 2198680             | Unknown           |
| 2000973   | 247507     | HCV   | 56  | F   | Israel           | 3103008             | blood transfusion |
| 2000976   | 216892     | HCV   | 44  | M   | Israel           | 452508              | Blood-hemophilia  |
| 2000982   | 247632     | HCV   | 44  | F   | FSU              | 488765              | blood transfusion |
| 2000984   | 247660     | HCV   | 78  | M   | Iran             | 2502079             | blood transfusion |
| 2000986   | 247705     | HCV   | 58  | F   | Ukraine          | 3.3.10 <sup>6</sup> | Unknown           |
| 2000989   | 247700     | HCV   | 33  | M   | Ukraine          | 1931756             | IDU               |
| 2001001   | 247768     | HCV   | 68  | F   | Georgia          | n.d.                | blood transfusion |
| 2001005   | 232803     | HCV   | 31  | F   | unknown          | n.d.                | Unknown           |
| 2001011   | 247894     | HCV   | 74  | M   | USA              | n.d.                | blood transfusion |
| 2001044   | 248055     | HCV   | 39  |     | Israel           | 381340              | Unknown           |
| 2001049   | 236209     | HCV   | 31  | M   | FSU              | 7505522             | IDU               |
| 2001052   | 217766     | HCV   | 45  | M   | Israel           | 780010              | Blood-hemophilia  |
| 2001065   | 248192     | HCV   | 0   | M   | FSU              | 3239143             | Health worker     |
| 2001067   | 248219     | HCV   | 67  | M   | FSU              | 221114              | blood transfusion |
| 2001069   | 248224     | HCV   | 62  | F   | FSU              | 252125              | blood transfusion |
| 2001070   | 215645     | HCV   | 51  | M   | Israel           | 6144255             | Blood-hemophilia  |
| 2001072   | 235194     | HCV   | 38  | M   | Russia           | 13213911            | IDU               |
| 2001079   | 248263     | HCV   | 67  | F   | USA              | 512313              | blood transfusion |
| 2001088   | 248315     | HCV   | 52  | M   | Ukraine          | 1753181             | Unknown           |
| 2001092   | 248330     | HCV   | 51  | M   | Ukraine          | 2294028             | IDU               |
| 2001106   | 248398     | HCV   | 49  | M   | Ukraine          | 1009648             | Unknown           |
| 2001108   | 248400     | HCV   | 63  | F   | Romenia          | 552945              | blood transfusion |
| 2001114   | 248417     | HCV   | 81  | F   | Moldova          | 736509              | blood transfusion |
| 2001121   | 248423     | HCV   | 60  | F   | Ukraine          | 237366              | blood transfusion |
| 2001123   | 240368     | HCV   | 33  | M   | Israel           | 45579               | MSM               |
| 2001129   | 248467     | HCV   | 34  | M   | Russia           | 1430194             | blood transfusion |
| 2001133   | 248505     | HCV   | 46  | M   | Israel           | 2.3x10 <sup>7</sup> | IDU               |
| 2001137   | 248555     | HCV   | 59  | M   | Israel           | 1339334             | IDU               |
| 2001144   | 248570     | HCV   | 61  | M   | Israel           | 5290137             | blood transfusion |
| 2001159   | 248644     | HCV   | 54  | F   | FSU              | 1580109             | blood transfusion |
| 2001160   | 248646     | HCV   | 59  | M   | Israel           | 715743              | IDU               |
| 2001172   | 225434     | HCV   | 52  | M   | Israel           | 393937              | Blood-hemophilia  |
| 2001206   | 229328     | HCV   | 36  | M   | Germany          | n.d.                | MSM               |
| 2001218   | 248956     | HCV   | 0   | F   | FSU              | 247641              | Health worker     |
| 2001220   | 234810     | HCV   | 50  | M   | Uzbekistan       | 184194              | IDU               |

| Sample ID | Patient ID | age | sex    | Birth country | HBV VL (cps/ml) | HBV Ct | HDV VL/ ct           | HDV Ct               |       |
|-----------|------------|-----|--------|---------------|-----------------|--------|----------------------|----------------------|-------|
| 2000166   | 243525     | 0   | female | no info       |                 |        |                      | 46                   |       |
| 2000208   | 243553     | 31  | female | Uzbekistan    | 148.45          | 34.64  | 1150000              |                      |       |
| 2000234   | 241470     | 50  | male   | Ukraine       |                 |        |                      | 248000               |       |
| 2000236   | 243524     | 59  | male   | Russia        | 5.09            | 37.11  | 2140000              |                      |       |
| 2000319   | 243566     | 35  | female | no info       | 0.99            | 42.94  | 54750                |                      |       |
| 2000320   | 243567     | 40  | female | Russia        | indeterminate   |        |                      | 173563               |       |
| 2000322   | 243568     | 55  | female | no info       | 410.94          | 33.07  | 40000                |                      |       |
| 2000324   | 243569     | 34  | female | Russia        |                 |        |                      | 43500                |       |
| 2000372   | 243558     | 37  | male   | Russia        |                 |        |                      | 21800000             |       |
| 2000568   | 243568     | 56  | female | no info       |                 |        |                      | 1.3x10 <sup>6</sup>  |       |
| 2000570   | 243983     | 41  | female | Russia        |                 |        |                      | 1.24x10 <sup>9</sup> |       |
| 2000741   | 245513     | 50  | female | Russia        |                 |        |                      | 349                  |       |
| 2000742   | 245514     | 46  | male   | Ethiopia      | 218.75          | 35.00  | 4.48x10 <sup>4</sup> |                      |       |
| 2000744   | 245522     | 47  | male   | Russia        | 984.64          | 32.80  | 8.74x10 <sup>4</sup> |                      |       |
| 2000999   | 243521     | 41  | male   | Russia        |                 |        |                      | 1.15x10 <sup>6</sup> |       |
| 2001063   | 243562     | 43  | male   | Russia        |                 |        |                      | 3.03x10 <sup>7</sup> | 16.6  |
| 2001073   | 244398     | 39  | male   | Russia        |                 |        |                      | 1.26x10 <sup>6</sup> |       |
| 2001149   | 243562     | 42  | male   | Russia        |                 |        |                      | positive             | 16.8  |
| 2001167   | 248173     | 71  | female | Russia        |                 |        |                      |                      | 22.2  |
| 2001178   | 248089     | 45  | male   | Ukraine       |                 |        |                      | positive             |       |
| 2001190   | 248835     | 40  | male   | Ukraine       |                 |        |                      |                      | 17.17 |
| 2001210   | 246155     | 74  | female | Russia        |                 |        |                      | positive             | 24.7  |
| 2001212   | 248907     | 34  | male   | Ukraine       | 39 IU/ml        |        |                      | 5.3x10 <sup>6</sup>  | 19    |
| 2001222   | 248970     | 61  | male   | Romania       |                 |        |                      | 9.11x10 <sup>6</sup> | 18.2  |
| 2001228   | 248980     | 34  | male   | no info       |                 |        |                      | 7.52x10 <sup>7</sup> | 14.7  |
| 2001234   | 249018     | 33  | female | no info       |                 |        |                      | 1.66x10 <sup>5</sup> | 24.7  |
