# Supplementary material for: Advanced molecular surveillance approaches for characterization of blood borne hepatitis viruses
Source: PubMed Central journal article supplement (PMC7367454; doi:10.1371/journal.pone.0236046), 2020-07-17
Supplement: pone.0236046.s004.pdf [file pone.0236046.s004.pdf]

| Sample ID              | Total Reads | HCV Reads | % Coverage | Classification | Reads/Million |
|------------------------|-------------|-----------|------------|----------------|---------------|
| 1_HCV_Israeli_2000427  | 2,094,338   | 1,127     | 97.68      | 1B             | 538           |
| 2_HCV_Israeli_2000444  | 11,159,480  | 2,176     | 96.82      | 1B             | 195           |
| 3_HCV_Israeli_2000445  | 12,884,712  | 1,193     | 96.12      | 1B             | 93            |
| 4_HCV_Israeli_2000446  | 719,267     | 6,573     | 100        | 1B             | 9,138         |
| 5_HCV_Israeli_2000447  | 1,223,499   | 5,492     | 98.08      | 1B             | 4,489         |
| 6_HCV_Israeli_2000449  | 473,173     | 2,603     | 99.35      | 1A             | 5,501         |
| 7_HCV_Israeli_2000463  | 1,312,068   | 2,329     | 96.82      | 1B             | 1,775         |
| 8_HCV_Israeli_2000478  | 12,198,916  | 1,906     | 97.9       | 1B             | 156           |
| 9_HCV_Israeli_2000484  | 4,318,906   | 2,822     | 99.86      | 1B             | 653           |
| 10_HCV_Israeli_2000485 | 17,816,566  | 1,390     | 97.21      | 1B             | 78            |
| 11_HCV_Israeli_2000487 | 12,282,440  | 3         | 2.16       | (-)            | 0             |
| 12_HCV_Israeli_2000502 | 10,128,136  | 14,234    | 100        | 1A             | 1,405         |
| 13_HCV_Israeli_2000512 | 9,511,250   | 11,322    | 99.95      | 1A             | 1,190         |
| 14_HCV_Israeli_2000513 | 8,315,644   | 21,476    | 97.33      | 1B             | 2,583         |
| 15_HCV_Israeli_2000516 | 5,696,236   | 1,961     | 96.3       | 1A             | 344           |
| 16_HCV_Israeli_2000517 | 4,862,078   | 3,667     | 97.9       | 1B             | 754           |
| 17_HCV_Israeli_2000545 | 3,089,350   | 7,959     | 99.35      | 1B             | 2,576         |
| 18_HCV_Israeli_2000554 | 11,274,782  | 24,033    | 100        | 1A             | 2,132         |
| 19_HCV_Israeli_2000561 | 11,104,238  | 6,920     | 98.13      | 1B             | 623           |
| 20_HCV_Israeli_2000572 | 7,043,992   | 42,511    | 99.95      | 1B             | 6,035         |
| 21_HCV_Israeli_2000573 | 11,277,786  | 18,129    | 99.28      | 1B-basal       | 1,607         |
| 22_HCV_Israeli_2000613 | 4,751,790   | 4,200     | 99.19      | 1B             | 884           |
| 23_HCV_Israeli_2000615 | 12,956,642  | 31,809    | 98.11      | 1B             | 2,455         |
| 24_HCV_Israeli_2000616 | 11,423,692  | 42,267    | 99.05      | 1A             | 3,700         |
| 25_HCV_Israeli_2000618 | 10,901,586  | 23,683    | 97.96      | 1B             | 2,172         |
| 26_HCV_Israeli_2000619 | 11,832,470  | 8,689     | 98.04      | 1B             | 734           |
| 27_HCV_Israeli_2000621 | 9,822,408   | 37,033    | 98.17      | 1B             | 3,770         |
| 28_HCV_Israeli_2000637 | 14,007,920  | 8,670     | 98.07      | 1B             | 619           |
| 29_HCV_Israeli_2000646 | 8,836,370   | 72,736    | 100        | 1B             | 8,231         |
| 30_HCV_Israeli_2000670 | 16,412,334  | 44,732    | 99.35      | 1B             | 2,726         |
| 31_HCV_Israeli_2000672 | 12,368,504  | 40,003    | 98.13      | 1B             | 3,234         |
| 32_HCV_Israeli_2000684 | 7,728,012   | 6,132     | 100        | 1B             | 793           |
| 33_HCV_Israeli_2000691 | 7,220,362   | 37,566    | 100        | 1B             | 5,203         |
| 34_HCV_Israeli_2000692 | 8,707,132   | 16,337    | 99.99      | 1B             | 1,876         |
| 35_HCV_Israeli_2000693 | 14,367,392  | 54,143    | 98.12      | 1B             | 3,768         |
| 36_HCV_Israeli_2000697 | 5,152,816   | 17,061    | 99.27      | 2C             | 3,311         |
| 37_HCV_Israeli_2000726 | 9,184,498   | 90,924    | 100        | 1B             | 9,900         |
| 38_HCV_Israeli_2000734 | 14,669,110  | 11,466    | 98.08      | 1B             | 782           |
| 39_HCV_Israeli_2000775 | 5,832,020   | 178,799   | 99.83      | 1B             | 30,658        |
| 40_HCV_Israeli_2000781 | 31,458,172  | 5         | 3.14       | (-)            | 0             |
| 41_HCV_Israeli_2000782 | 25,823,076  | 12,445    | 99.32      | 1B             | 482           |
| 42_HCV_Israeli_2000785 | 33,528      | 65        | 28.14      | (-)            | 1,939         |
| 43_HCV_Israeli_2000790 | 24,055,978  | 58,740    | 97.57      | 1B             | 2,442         |
| 44_HCV_Israeli_2000791 | 12,524,798  | 92,788    | 100        | 1B             | 7,408         |
| 45_HCV_Israeli_2000798 | 28,443,036  | 82,188    | 100        | 1B             | 2,890         |
| 46_HCV_Israeli_2000810 | 15,780,030  | 8,912     | 97.83      | 1A             | 565           |
| 47_HCV_Israeli_2000811 | 7,870,168   | 115,775   | 98.2       | 1A             | 14,711        |
| 48_HCV_Israeli_2000912 | 19,911,460  | 26,981    | 98.64      | 3A             | 1,355         |
| 49_HCV_Israeli_2000976 | 16,383,008  | 109,738   | 99.75      | 3A             | 6,698         |

| Sample ID              | Total Reads | HCV Reads | % Coverage | Classification | Reads/Million |
|------------------------|-------------|-----------|------------|----------------|---------------|
| 50_HCV_Israeli_2000982 | 22,078,886  | 23,533    | 97.72      | 1B             | 1,066         |
| 51_HCV_Israeli_2000984 | 15,351,242  | 245,729   | 100        | 1B             | 16,007        |
| 52_HCV_Israeli_2000986 | 7,283,694   | 428,233   | 98.26      | 1B             | 58,793        |
| 53_HCV_Israeli_2001001 | 21,011,786  | 15,619    | 97.97      | 1B             | 743           |
| 54_HCV_Israeli_2001005 | 9,154,770   | 148,098   | 100        | 1B             | 16,177        |
| 55_HCV_Israeli_2001052 | 10,202,678  | 218,194   | 100        | 1B             | 21,386        |
| 56_HCV_Israeli_2001065 | 11,435,392  | 280,302   | 99.62      | 3A             | 24,512        |
| 57_HCV_Israeli_2001069 | 20,714,334  | 60,421    | 98.13      | 1B             | 2,917         |
| 58_HCV_Israeli_2001072 | 7,363,986   | 908,612   | 98.25      | 1B             | 123,386       |
| 59_HCV_Israeli_2001079 | 13,590,740  | 142,352   | 100        | 1B             | 10,474        |
| 60_HCV_Israeli_2001108 | 14,438,324  | 112,942   | 99.99      | 1B             | 7,822         |
| 61_HCV_Israeli_2001114 | 17,821,262  | 19,490    | 100        | 1B             | 1,094         |
| 62_HCV_Israeli_2001121 | 29,412,046  | 4,595     | 97.11      | 1B             | 156           |
| 63_HCV_Israeli_2001123 | 15,823,778  | 20,029    | 97.97      | 1B             | 1,266         |
| 64_HCV_Israeli_2001129 | 14,919,690  | 55,779    | 100        | 1B             | 3,739         |
| 65_HCV_Israeli_2001133 | 10,194,678  | 167,486   | 99.99      | 3A             | 16,429        |
| 66_HCV_Israeli_2001144 | 7,901,544   | 74,205    | 98.23      | 1B             | 9,391         |
| 67_HCV_Israeli_2001160 | 10,010,772  | 31,526    | 100        | 1B             | 3,149         |
| 68_HCV_Israeli_2001172 | 16,635,230  | 27,815    | 100        | 1A             | 1,672         |
| 69_HCV_Israeli_2001206 | 6,883,796   | 60,907    | 99.99      | 1A             | 8,848         |
| 70_HCV_Israeli_2001220 | 7,995,474   | 179,016   | 99.71      | 3A             | 22,390        |
| 71_HCV_Israeli_2000599 | 3,719,732   | 998       | 92.98%     | 1A             | 268           |
| 72_HCV_Israeli_2000602 | 3,416,754   | 1,437     | 98.04%     | 1B             | 421           |
| 73_HCV_Israeli_2000607 | 1,007,238   | 932       | 92.33%     | 1A             | 925           |
| 74_HCV_Israeli_2000633 | 3,785,392   | 4,987     | 99.38%     | 1B             | 1,317         |
| 75_HCV_Israeli_2000650 | 202,334     | 96        | 15.99%     | 1B             | 474           |
| 76_HCV_Israeli_2000668 | 1,186,310   | 13,308    | 98.00%     | 1B             | 11,218        |
| 77_HCV_Israeli_2000669 | 3,489,148   | 999       | 92.93%     | 1B             | 286           |
| 78_HCV_Israeli_2000675 | 4,770,178   | 173       | 43.61%     | 1B             | 36            |
| 79_HCV_Israeli_2000676 | 3,271,126   | 335       | 65.57%     | 1B             | 102           |
| 80_HCV_Israeli_2000694 | 2,821,612   | 28,047    | 99.44%     | 1B             | 9,940         |
| 81_HCV_Israeli_2000705 | 4,033,674   | 2,473     | 98.80%     | 1B             | 613           |
| 82_HCV_Israeli_2000883 | 2,170,316   | 4,973     | 97.68%     | 1A             | 2,291         |
| 83_HCV_Israeli_2000887 | 7,713,096   | 702       | 62.29%     | 1B             | 91            |
| 84_HCV_Israeli_2000889 | 4,786,486   | 612       | 79.96%     | 1B             | 128           |
| 85_HCV_Israeli_2000913 | 3,699,324   | 2,133     | 97.61%     | 1A             | 577           |
| 86_HCV_Israeli_2000929 | 2,981,288   | 3,365     | 97.44%     | 1A             | 1,129         |
| 87_HCV_Israeli_2000973 | 1,013,476   | 4,074     | 98.90%     | 1B             | 4,020         |
| 88_HCV_Israeli_2000989 | 7,815,930   | 8,953     | 98.45%     | 1B             | 1,145         |
| 89_HCV_Israeli_2001011 | 913,152     | 1,337     | 95.74%     | 1A             | 1,464         |
| 90_HCV_Israeli_2001044 | 7,862,446   | 2,979     | 86.27%     | 1A             | 379           |
| 91_HCV_Israeli_2001049 | 8,528,684   | 26,192    | 100.00%    | 3A             | 3,071         |
| 92_HCV_Israeli_2001067 | 10,999,572  | 2,637     | 95.34%     | 1B             | 240           |
| 93_HCV_Israeli_2001070 | 1,356,688   | 5,235     | 100.00%    | 1A             | 3,859         |
| 94_HCV_Israeli_2001088 | 972,990     | 1,892     | 98.41%     | 1B             | 1,945         |
| 95_HCV_Israeli_2001092 | 3,453,448   | 4,206     | 99.05%     | 3A             | 1,218         |
| 96_HCV_Israeli_2001106 | 2,892,372   | 17,230    | 99.94%     | 3A             | 5,957         |
| 97_HCV_Israeli_2001137 | 2,897,304   | 2,527     | 97.32%     | 1A             | 872           |
| 98_HCV_Israeli_2001159 | 1,270,000   | 505       | 75.44%     | 1B             | 398           |
| 99_HCV_Israeli_2001218 | 3,404,192   | 2,656     | 99.51%     | 1B             | 780           |
