# Supplementary material for: Advanced molecular surveillance approaches for characterization of blood borne hepatitis viruses
Source: PubMed Central journal article supplement (PMC7367454; doi:10.1371/journal.pone.0236046), 2020-07-17
Supplement: pone.0236046.s005.pdf [file pone.0236046.s005.pdf]

Pairwise nucleotide identity between HDV mNGS and xGen consensus sequences

| Specimen ID | % identity | gapstripped alignment |
|-------------|------------|-----------------------|
| 2000166     | 87.02532   | 314                   |
| 2000208     | 99.34598   | 1527                  |
| 2000234     | 96.30819   | 623                   |
| 2000236     | 98.63192   | 1532                  |
| 2000319     | 91.71843   | 965                   |
| 2000320     | 99.47917   | 192                   |
| 2000322     | 97.34848   | 1578                  |
| 2000324     | 96.61164   | 1150                  |
| 2000372     | 99.46381   | 1492                  |
| 2000563     | 98.84511   | 1470                  |
| 2000570     | 99.33378   | 1501                  |
| 2000741     | 91.01449   | 345                   |
| 2000742     | 96.30404   | 1431                  |
| 2000744     | 99.61165   | 1545                  |
| 2000999     | 99.81774   | 1646                  |
| 2001063     | 99.47678   | 1528                  |
| 2001073     | 99.42122   | 1554                  |
| 2001149     | 99.44751   | 1628                  |
| 2001167     | 99.0572    | 1591                  |
| 2001178     | 99.60707   | 1526                  |
| 2001190     | 99.75728   | 1648                  |
| 2001210     | 99.67448   | 1535                  |
| 2001212     | 96.46279   | 1353                  |
| 2001222     | 98.1685    | 1364                  |
| 2001228     | 98.92857   | 1679                  |
| 2001234     | 98.52399   | 1355                  |
